# Supplementary material
Source: PubMed Central journal article supplement (PMC6233869)
Supplement: NIHMS78005-supplement-Supplementary_tables.pdf [file NIHMS78005-supplement-Supplementary_tables.pdf]

**Supplementary Tables For:**

**Title: Structure of the Core of the Type Three Secretion System Export Apparatus**

**Authors:** Lucas Kuhlen<sup>1,2†</sup>, Patrizia Abrusci<sup>1†</sup>, Steven Johnson<sup>1†</sup>, Joseph Gault<sup>2</sup>, Justin Deme<sup>1,3</sup>, Joseph Caesar<sup>1,3</sup>, Tobias Dietsche<sup>4</sup>, Mehari Tesfazgi Mebrhatu<sup>4</sup>, Tariq Ganief<sup>5</sup>, Boris Macek<sup>5</sup>, Samuel Wagner<sup>4,6</sup>, Carol V. Robinson<sup>2</sup> & Susan M. Lea<sup>1,3\*</sup>

**Affiliations:**

<sup>1</sup>Sir William Dunn School of Pathology, University of Oxford, South Parks Road, Oxford OX1 3RE, UK.

<sup>2</sup>Department of Chemistry, University of Oxford, 12 Mansfield Road, Oxford OX1 3TA, UK.

<sup>3</sup>Central Oxford Structural Microscopy and Imaging Centre, University of Oxford, South Parks Road, Oxford OX1 3RE.

<sup>4</sup> Section of Cellular and Molecular Microbiology, Interfaculty Institute of Microbiology and Infection Medicine (IMIT), University of Tübingen, Elfriede-Aulhorn-Str. 6, 72076 Tübingen, Germany

<sup>5</sup> Proteome Center Tübingen, University of Tübingen, Auf der Morgenstelle 15, 72076 Tübingen, Germany

<sup>6</sup> German Center for Infection Research, Partner-site Tübingen, Elfriede-Aulhorn-Str. 6, 72076 Tübingen, Germany

\*Correspondence to: Susan M. Lea, [susan.lea@path.ox.ac.uk](mailto:susan.lea@path.ox.ac.uk).

†These authors made equal contributions to the work presented herein.

| Protein Complex         | Fig 1 Panel | Deconvoluted Mass (Da) | Theoretical Mass (Da) | Difference (Da) | Assignment                                   |
|-------------------------|-------------|------------------------|-----------------------|-----------------|----------------------------------------------|
| Flagellum PQR in DDM    | B (left)    | 155961                 | 155917                | 44              | P <sub>5</sub> R <sub>1</sub>                |
|                         |             | 165552                 | 165534                | 18              | P <sub>5</sub> Q <sub>1</sub> R <sub>1</sub> |
| Flagellum PQR in LMNG   | C (left)    | 196976                 | 196959                | 17              | P <sub>5</sub> Q <sub>4</sub> R <sub>1</sub> |
|                         |             | 206943                 | 206909                | 34              | P <sub>5</sub> Q <sub>5</sub> R <sub>1</sub> |
| Injectisome PQR in DDM  | B (right)   | 153825                 | 153791                | 34              | P <sub>5</sub> R <sub>1</sub>                |
|                         |             | 163274                 | 163248                | 26              | P <sub>5</sub> Q <sub>1</sub> R <sub>1</sub> |
|                         |             | 172725                 | 172705                | 20              | P <sub>5</sub> Q <sub>2</sub> R <sub>1</sub> |
| Injectisome PQR in LMNG | C (right)   | 153795                 | 153791                | 4               | P <sub>5</sub> R <sub>1</sub>                |
|                         |             | 163245                 | 163248                | -3              | P <sub>5</sub> Q <sub>1</sub> R <sub>1</sub> |
|                         |             | 172710                 | 172705                | 5               | P <sub>5</sub> Q <sub>2</sub> R <sub>1</sub> |
|                         |             | 182175                 | 182163                | 12              | P <sub>5</sub> Q <sub>3</sub> R <sub>1</sub> |

| Protein Complex                                        | Monomer Mass Used in Calculation (Da) |                                                   |
|--------------------------------------------------------|---------------------------------------|---------------------------------------------------|
| Flagellum PQR in DDM <i>S. Typhimurium</i>             | 24567                                 | P NterFormyl (cleavage site confirmed as Ala20)   |
|                                                        | 9618                                  | Q 50% NterFormyl (ratio from dissociated monomer) |
|                                                        | 33079                                 | R NterFormyl                                      |
| Flagellum PQR in LMNG <i>Pseudomonas savastanoi</i>    | 24964                                 | P                                                 |
|                                                        | 9950                                  | Q NterFormyl                                      |
|                                                        | 32338                                 | R (mass calculated from sequence)                 |
| Injectisome PQR in DDM & LMNG <i>Shigella flexneri</i> | 24228                                 | P NterFormyl                                      |
|                                                        | 9457                                  | Q NterFormyl                                      |
|                                                        | 32652                                 | R NterFormyl                                      |

**Table S1.** Masses of protein complexes measured in Fig 1. and assignment based on comparison with theoretical masses. The site of signal peptide cleavage for FliP, and N terminal modification for all other species was determined by high energy dissociation of the intact complexes and mass measurement of individual subunits by native mass spectrometry. Theoretical masses were then calculated from the sequence taking into account any observed posttranslational modifications.

|        | P1 (A) | P2 (B) | P3 (C) | P4 (D) | P5 (E) | R (F)  | Q1 (G) | Q2 (H) | Q3 (I) | Q4 (J) |
|--------|--------|--------|--------|--------|--------|--------|--------|--------|--------|--------|
| P1 (A) |        | 1843.6 | 11.6   |        |        | 1786.1 | 1115.8 | 96.6   |        |        |
| P2 (B) | 1843.6 |        | 1871   | 9.9    |        | 50.5   | 163.1  | 1169.9 | 117.3  |        |
| P3 (C) | 11.6   | 1871   |        | 1750.1 |        | 81.5   | 46.5   | 166.6  | 1105.6 | 119.9  |
| P4 (D) |        | 9.9    | 1750.1 |        | 1548.2 | 206.1  |        | 37.6   | 162.3  | 1092.8 |
| P5 (E) |        |        |        | 1548.2 |        | 2142.5 |        |        | 41.4   | 162.8  |
| R (F)  | 1786.1 | 50.5   | 81.5   | 206.1  | 2142.5 |        | 903.4  |        |        | 8.7    |
| Q1 (G) | 1115.8 | 163.1  | 46.5   |        |        | 903.4  |        | 489.2  |        |        |
| Q2 (H) | 96.6   | 1169.9 | 166.6  | 37.6   |        |        | 489.2  |        | 467.7  |        |
| Q3 (I) |        | 117.3  | 1105.6 | 162.3  | 41.4   |        |        | 467.7  |        | 505.9  |
| Q4 (J) |        |        | 119.9  | 1092.8 | 162.8  | 8.7    |        |        | 505.9  |        |

**Table S2.** Protein surface area ( $\text{\AA}^2$ ) buried on each chain in assembly of P<sub>5</sub>Q<sub>4</sub>R<sub>1</sub> export gate complex as assessed using PISA

Contacts between PQR and B

| Residue in R | Residue in B |
|--------------|--------------|
| L188         | A182         |
| T192         | A186         |
| A200         | T160         |
| L199         | V190         |

Contacts between PQR and the rod

| Residue in P | Residue in FliE |
|--------------|-----------------|
| V42          | G85             |
| L58          | V99             |

  

| Residue in P | Residue in FlgB |
|--------------|-----------------|
| L45          | V133            |
| T44          | V133            |

**Table S3.** Co-evolutionary contacts between PQR, B and FliE and FlgB determined using Gremlin<sup>22</sup>.

| <b>Name</b>      | <b>Sequence</b>                                                  |
|------------------|------------------------------------------------------------------|
| gib_pT12_PrgK_f  | GAAATTCAGG AGGAATTCAC CATGATTCGT CGATATCTAT<br>ATACTTTTC         |
| gib_pT12_prgK_r2 | CTTCTCTCAT CCGCCAAAAC AGCCAAGCTT CATTCAATTTG<br>ACGATTCGC CTTATC |
| gib_uni_pT12_f   | AGCTTGGCTGTTTTGGCGGATG                                           |
| gib_uni_pT12_r   | GGTGAATTCCTCCTGAATTTTC                                           |
| prgK_E138X_QC_f  | CCATATTAGTTATGATATTGATGCTGGTTAGAATGGCCGCCGCCAAA<br>AC            |
| prgK_E138X_QC_r  | GTTTTGGCGGGCGGCCATTCTAACCAGCATCAATATCATAACTAATATG<br>G           |
| pT12_f           | GAAAACCTGTA CTTCAGGGTC                                           |
| pT12_r           | TGGTGAATTCCTCCTGAATTTTC                                          |
| FliO_SALTY_f     | CAGGAGGAATTCACCATGAAGACAGAAGCCACGGTTTCTC                         |
| FliR_SALTY_r     | GAAGTACAGGTTTTCTGGGTTATTATTTATCGGCATCTCG                         |
| FliO_PSESH_f     | TCAGGAGGAATTCACCATGAGGCGCTGGCTAAGTGTTCTG                         |
| FliR_PSESH_r     | CCCTGGAAGTACAGGTTTTACGAGCCCTCACCATATCGC                          |
| Spa24_f          | GACTGGTCGTAATGAAGATGGTAAAGGAGTAATCTCATGCTG                       |
| Spa29_r          | GAAGTACAGGTTTTCTCTAACAAATAGATTTGTGAAAAATTTATGTTC                 |
| pBAD_f           | AGCGCCGTCGACCATCATC                                              |
| pBAD_r           | CATGGTTAATTCCTCCTGTTAGCCC                                        |
| FlhB_f           | GAGGAATTAACCGTGGCAGAAGAGAGCGACG                                  |
| FlhA_r           | GATGATGGTCGACGGCGCTTTTTCTCCAATGGTCGCCG                           |

**Table S4.** Primers used in this study

| <i>Escherichia coli</i> | Description                                                     | Reference                                                                                                                                                                                                                                                                                                                                                                                 | Construction note                                                                                                                                                                                                                                                                |
|-------------------------|-----------------------------------------------------------------|-------------------------------------------------------------------------------------------------------------------------------------------------------------------------------------------------------------------------------------------------------------------------------------------------------------------------------------------------------------------------------------------|----------------------------------------------------------------------------------------------------------------------------------------------------------------------------------------------------------------------------------------------------------------------------------|
| MT56                    |                                                                 | Baumgarten, T., Schlegel, S., Wagner, S., Löw, M., Eriksson, J., Bonde, I., et al. (2017). Isolation and characterization of the <i>E. coli</i> membrane protein production strain Mutant56(DE3). Scientific Reports, 7, 45089. <a href="http://doi.org/10.1038/srep45089">http://doi.org/10.1038/srep45089</a>                                                                           |                                                                                                                                                                                                                                                                                  |
| <i>Salmonella</i>       | Description                                                     | Reference                                                                                                                                                                                                                                                                                                                                                                                 | Construction note                                                                                                                                                                                                                                                                |
| MIB3147                 | SL1344, $\Delta prgK$ , SpaP <sup>FLAG</sup> , <i>flhD::tet</i> | this study                                                                                                                                                                                                                                                                                                                                                                                | Made by allelic exchange using the following suicide plasmid: pSB3537, pMIB5169                                                                                                                                                                                                  |
| MIB3148                 | SL1344, $\Delta prgK$ , SpaR <sup>FLAG</sup> , <i>flhD::tet</i> | this study                                                                                                                                                                                                                                                                                                                                                                                | Made by allelic exchange using the following suicide plasmid: pSB3539, pMIB5169                                                                                                                                                                                                  |
| MIB3118                 | SL1344, InvC <sub>K165E</sub> , <i>flhD::tet</i>                | this study                                                                                                                                                                                                                                                                                                                                                                                | Made by allelic exchange using the following suicide plasmid: pMIB5264                                                                                                                                                                                                           |
| Plasmids                | Description                                                     | Reference                                                                                                                                                                                                                                                                                                                                                                                 | Construction note                                                                                                                                                                                                                                                                |
| pSB3537                 | pSB890 SpaP <sup>FLAG</sup>                                     | Wagner, S., Königsmaier, L., Lara-Tejero, M., Lefebvre, M., Marlovits, T. C., & Galán, J. E. (2010). Organization and coordinated assembly of the type III secretion export apparatus. Proceedings of the National Academy of Sciences of the United States of America, 107(41), 17745–17750. <a href="http://doi.org/10.1073/pnas.1008053107">http://doi.org/10.1073/pnas.1008053107</a> |                                                                                                                                                                                                                                                                                  |
| pSB3539                 | pSB890 SpaR <sup>FLAG</sup>                                     | Wagner, S., Königsmaier, L., Lara-Tejero, M., Lefebvre, M., Marlovits, T. C., & Galán, J. E. (2010). Organization and coordinated assembly of the type III secretion export apparatus. Proceedings of the National Academy of Sciences of the United States of America, 107(41), 17745–17750. <a href="http://doi.org/10.1073/pnas.1008053107">http://doi.org/10.1073/pnas.1008053107</a> |                                                                                                                                                                                                                                                                                  |
| pMIB5169                | pSB890 $\Delta prgK$                                            | Dietsche, T., Tesfazgi Mebrhatu, M., Brunner, M. J., Abrusci, P., Yan, J., Franz-Wachtel, M., et al. (2016). Structural and functional characterization of the bacterial type III secretion export apparatus. PLoS Pathogens, 12(12), e1006071. <a href="http://doi.org/10.1371/journal.ppat.1006071">http://doi.org/10.1371/journal.ppat.1006071</a>                                     |                                                                                                                                                                                                                                                                                  |
| pMIB5264                | pSB890 InvC <sub>K165E</sub>                                    | Dietsche, T., Tesfazgi Mebrhatu, M., Brunner, M. J., Abrusci, P., Yan, J., Franz-Wachtel, M., et al. (2016). Structural and functional characterization of the bacterial type III secretion export apparatus. PLoS Pathogens, 12(12), e1006071. <a href="http://doi.org/10.1371/journal.ppat.1006071">http://doi.org/10.1371/journal.ppat.1006071</a>                                     | Made by site-directed mutagenesis using primers prgK_E138X_QC_f and prgK_E138X_QC_r.                                                                                                                                                                                             |
| pMIB6110                | pT10 <i>prgK</i>                                                | this study                                                                                                                                                                                                                                                                                                                                                                                | Made by Gibson assembly of PCR products of the following two primer/template pairs: 1. gib_pT12_prgK_f + gib_pT12_prgK_r2 from SL1344 chromosomal DNA; 2. gib_uni_pT12_f + gib_uni_pT12_r from pSB3398 (pT10). Mutated the wt TAG stop codon of <i>prgK</i> to a TGA stop codon. |
| pMIB6679                | pT10 PrgK <sub>E138pBpa</sub>                                   | this study                                                                                                                                                                                                                                                                                                                                                                                | Made by site-directed mutagenesis using primers prgK_E138X_QC_f and prgK_E138X_QC_r.                                                                                                                                                                                             |
| pSB3292                 | pBAD24 <i>hilA</i>                                              | Lara-Tejero, M., Kato, J., Wagner, S., Liu, X., & Galán, J. E. (2011). A sorting platform determines the order of protein secretion in bacterial type III systems. Science (New York, NY), 331(6021), 1188–1191. <a href="http://doi.org/10.1126/science.1201476">http://doi.org/10.1126/science.1201476</a>                                                                              |                                                                                                                                                                                                                                                                                  |

|                    |                                                                    |                                                                                                                                                                                                                                                                                                                                                               |                                                                                                                                                                                                         |
|--------------------|--------------------------------------------------------------------|---------------------------------------------------------------------------------------------------------------------------------------------------------------------------------------------------------------------------------------------------------------------------------------------------------------------------------------------------------------|---------------------------------------------------------------------------------------------------------------------------------------------------------------------------------------------------------|
| pSup-pBpa          |                                                                    | Ryu, Y., & Schultz, P. G. (2006). Efficient incorporation of unnatural amino acids into proteins in Escherichia coli. <i>Nature Methods</i> , 3(4), 263–265. <a href="http://doi.org/10.1038/nmeth864">http://doi.org/10.1038/nmeth864</a>                                                                                                                    |                                                                                                                                                                                                         |
| pMIB5689           | pT12, SpaPQR <sup>TEV2x</sup> <sub>StreptII</sub>                  | Dietsche, T., Tesfazgi Mebrhatu, M., Brunner, M. J., Abrusci, P., Yan, J., Franz-Wachtel, M., et al. (2016). Structural and functional characterization of the bacterial type III secretion export apparatus. <i>PLoS Pathogens</i> , 12(12), e1006071. <a href="http://doi.org/10.1371/journal.ppat.1006071">http://doi.org/10.1371/journal.ppat.1006071</a> |                                                                                                                                                                                                         |
| pT12_FliOPQR_SALTY | <i>S. Typhimurium</i> FliOPQR <sup>TEV2</sup> <sub>xStreptII</sub> | this study                                                                                                                                                                                                                                                                                                                                                    | Made by Gibson assembly of PCR products of the following two primer/template pairs: 1. pT12_f + pT12_r from pMIB5689; 2. FliO_SALTY_f + FliR_SALTY_r from <i>S. Typhimurium</i> genomic DNA.            |
| pT12_FliOPQR_PSESH | <i>P. savastanoi</i> FliOPQR <sup>TEV2</sup> <sub>xStreptII</sub>  | this study                                                                                                                                                                                                                                                                                                                                                    | Made by Gibson assembly of PCR products of the following two primer/template pairs: 1. pT12_f + pT12_r from pMIB5689; 2. FliO_PSESH_f + FliR_PSESH_r from <i>P. savastanoi</i> genomic DNA (DSM-21482). |
| pT12_Spa24929      | <i>S. flexneri</i> SctRST <sup>TEV2xS</sup> <sub>treptII</sub>     | this study                                                                                                                                                                                                                                                                                                                                                    | Made by Gibson assembly of PCR products of the following two primer/template pairs: 1. pT12_f + pT12_r from pMIB5689; 2. Spa24_f + Spa29_r from the <i>S. flexneri</i> virulence plasmid pWR100.        |
| pBAD_FlhBA         | <i>S. Typhimurium</i> FlhBA <sup>His</sup>                         | this study                                                                                                                                                                                                                                                                                                                                                    | Made by Gibson assembly of PCR products of the following two primer/template pairs: 1. pBAD_f + pBAD_r from pBAD; 2. FlhB_f + FlhA_r from <i>S. Typhimurium</i> genomic DNA.                            |

**Table S5.** Strains and plasmids used
